# Supplementary material
Source: PubMed Central journal article supplement (PMC1595452)

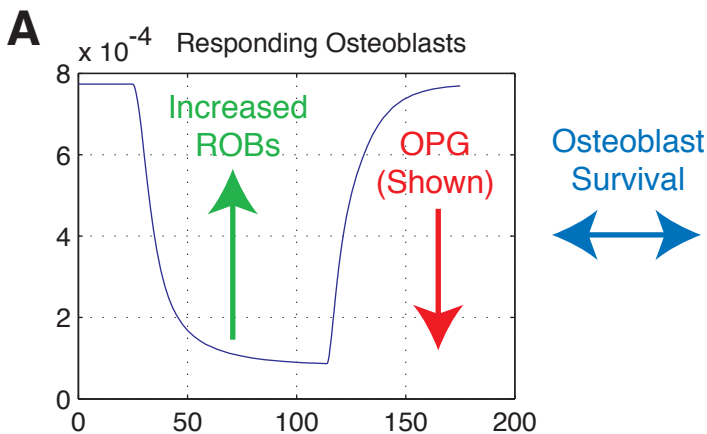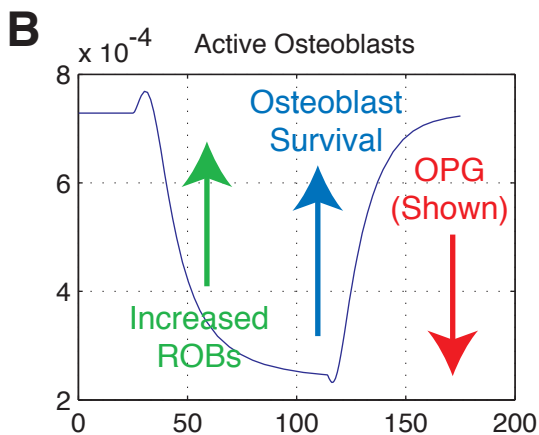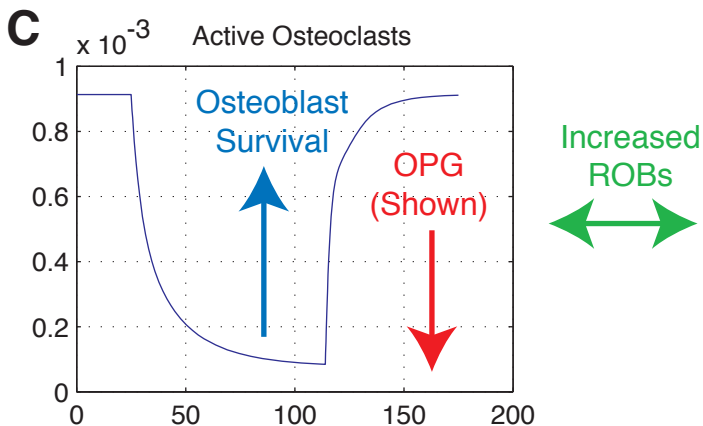

Supplement: pnas_0606805103_1.pdf [file pnas_0606805103_1.pdf]
